# Supplementary material
Source: PubMed Central journal article supplement (PMC6988393)
Supplement: baADV2019000524-suppl1.pdf [file baADV2019000524-suppl1.pdf]

## Supplemental Figure 1. Total Therapy Schemas

| Total Therapy 1<br>(August 1990 – June 1995) | Total Therapy 2<br>(October 1998 – February 2004) | Total Therapy 3<br>(February 2004 - August 2009)                                       | Total Therapy 4<br>(June 2008 – January 2019)                                                          |                                                                        |
|----------------------------------------------|---------------------------------------------------|----------------------------------------------------------------------------------------|--------------------------------------------------------------------------------------------------------|------------------------------------------------------------------------|
|                                              | Randomization ± Thal                              |                                                                                        | Light                                                                                                  | Standard                                                               |
| <b>Induction</b>                             | <b>Induction</b>                                  | <b>Induction</b>                                                                       | <b>Induction</b>                                                                                       | <b>Induction</b>                                                       |
| VAD x 3<br>HD CTX + HPC Collection<br>EDAP   | VAD ± Thal<br>DCEP 1 & 2<br>CAD + HPC Collection  | VDT-PACE<br>+ collection of CD34+ cells<br>VDT-PACE                                    | MEL-VDT-PACE<br>+ collection of CD34+ cells                                                            | MEL-VDT-PACE<br>+ collection of CD34+ cells<br>MEL-VDT PACE            |
| <b>Transplant</b>                            | <b>Transplant</b>                                 | <b>Transplant</b>                                                                      | <b>Transplant</b>                                                                                      | <b>Transplant</b>                                                      |
| MEL 200 mg/m2<br>MEL 200 mg/m2               | MEL 200 mg/m2<br>MEL 200 mg/m2                    | MEL 200 mg/m2<br>MEL 200 mg/m2                                                         | VDT-MEL 200 mg/m2<br>(fractionated: 50mg/m2 d1-4)<br>VDT-MEL 200 mg/m2<br>(fractionated: 50mg/m2 d1-4) | MEL 200 mg/m2<br>(unfractionated)<br>MEL 200 mg/m2<br>(unfractionated) |
| <b>Consolidation</b>                         | <b>Consolidation</b>                              | <b>Consolidation</b>                                                                   | <b>Consolidation</b>                                                                                   | <b>Consolidation</b>                                                   |
| Not Applicable                               | DPACE x 4 cycles ± Thal                           | VDT-PACE (dose reduced)<br>VDT-PACE (dose reduced)                                     | VDT-PACE (dose reduced)                                                                                | VDT-PACE (dose reduced)<br>VDT-PACE (dose reduced)                     |
| <b>Maintenance</b>                           | <b>Maintenance</b>                                | <b>Maintenance</b>                                                                     | <b>Maintenance</b>                                                                                     | <b>Maintenance</b>                                                     |
| IFN TIW                                      | Year 1: Dex + IFN ± Thal<br>Year 2-3: IFN ± Thal  | TT3A<br>Year 1: VTD weekly<br>Year 2-3: TD weekly<br><br>TT3B<br>Years 1-3: VRD weekly | Years 1-3: VRD weekly                                                                                  | Years 1-3: VRD                                                         |

| Total Therapy 5<br>(November 2008 - January 2019)                                      | Total Therapy 5b<br>(November 2008 - January 2019) | Total Therapy 6<br>(April 2009 - January 2019)                                 | Total Therapy 7<br>(August 2017 - )                                                       |
|----------------------------------------------------------------------------------------|----------------------------------------------------|--------------------------------------------------------------------------------|-------------------------------------------------------------------------------------------|
| <b>Induction</b>                                                                       | <b>Induction</b>                                   | <b>Induction</b>                                                               | <b>Induction</b>                                                                          |
| MEL10-VDT-PACE<br>+ collection of CD34+ cells                                          | MEL 10-CFZ-TD-PACE<br>+ PBSC collection            | MEL-10-VTD-PACE<br>+ PBSC collections                                          | KTD-Dara-PACE<br>+ PBSC Harvest                                                           |
| <b>Transplant 1</b>                                                                    | <b>Transplant 1</b>                                | <b>Transplant 1</b>                                                            | <b>Transplant 1</b>                                                                       |
| MEL-80 + VRD-PACE                                                                      | MEL-80 + CFZ-TD-PACE                               | MEL-80 - VRD-PACE                                                              | fMEL 200                                                                                  |
| <b>Intertherapy</b>                                                                    | <b>Intertherapy</b>                                | <b>Intertherapy</b>                                                            | <b>Intertherapy</b>                                                                       |
| MEL-20 (5mg/m2/d x 4d) + VTD-PACE<br>(75%) 2 cycles                                    | MEL-20 (5mg/m2/d x 4d) + CFZ-<br>TD-PACE (75%)     | MEL 5mg/m2-VDT-PACE 75%<br>MEL 5mg/m2-VDT-PACE 75%                             | Immunological-Consolidation 1<br>Daratumumab                                              |
|                                                                                        |                                                    |                                                                                | <b>Consolidation 1</b><br>Daratumumab + KD                                                |
| <b>Transplant 2</b>                                                                    | <b>Transplant 2</b>                                | <b>Transplant 2</b>                                                            | <b>Transplant 2</b>                                                                       |
| MEL-80 + VRD-PACE                                                                      | MEL-80 + CFZ-TD-PACE                               | MEL-80 - VRD-PACE                                                              | fMEL 200                                                                                  |
|                                                                                        | <b>Consolidation</b><br>CFZ-TD-PACE                |                                                                                |                                                                                           |
| <b>Maintenance</b>                                                                     | <b>Maintenance</b>                                 | <b>Maintenance</b>                                                             | <b>Maintenance</b>                                                                        |
| Year 1:<br>VRD/VMD alternating q month<br>Years 2-3:<br>VRD/VMD alternating q 2 months | Year 1:<br>CRD monthly<br>Years 2-3:<br>CD monthly | Year 1:<br>VRD alternating q month<br>Years 2-3:<br>VRD alternating q 2 months | Daratumumab (monthly) + KD*<br>Daratumumab (monthly) + RD<br>(alternating 3-month blocks) |

VDT-PACE: bortezomib (Velcade), dexamethasone, thalidomide, cisplatin (Platinum), doxorubicin (Adriamycin), cyclophosphamide, etoposide; MEL: melphalan; VTD: bortezomib (Velcade), thalidomide, dexamethasone; TD: thalidomide, dexamethasone; MEL-VDT-PACE: melphalan, bortezomib (Velcade), dexamethasone, thalidomide, cisplatin (Platinum), doxorubicin (Adriamycin), cyclophosphamide, etoposide; VDT-MEL: bortezomib (Velcade), dexamethasone, thalidomide, melphalan; VRD: bortezomib (Velcade), lenalidomide (Revlimid), dexamethasone; VMD: bortezomib (Velcade), melphalan, dexamethasone; CRD: carfilzomib, Revlimid®, dexamethasone; CD: carfilzomib + dexamethasone; fMEL: fractionated melphalan; KD: carfilzomib and dexamethasone; RD: lenalidomide and dexamethasone.

**Supplemental Figure 2. OS Kaplan-Meier Curves in Transplant Eligible Patients.**

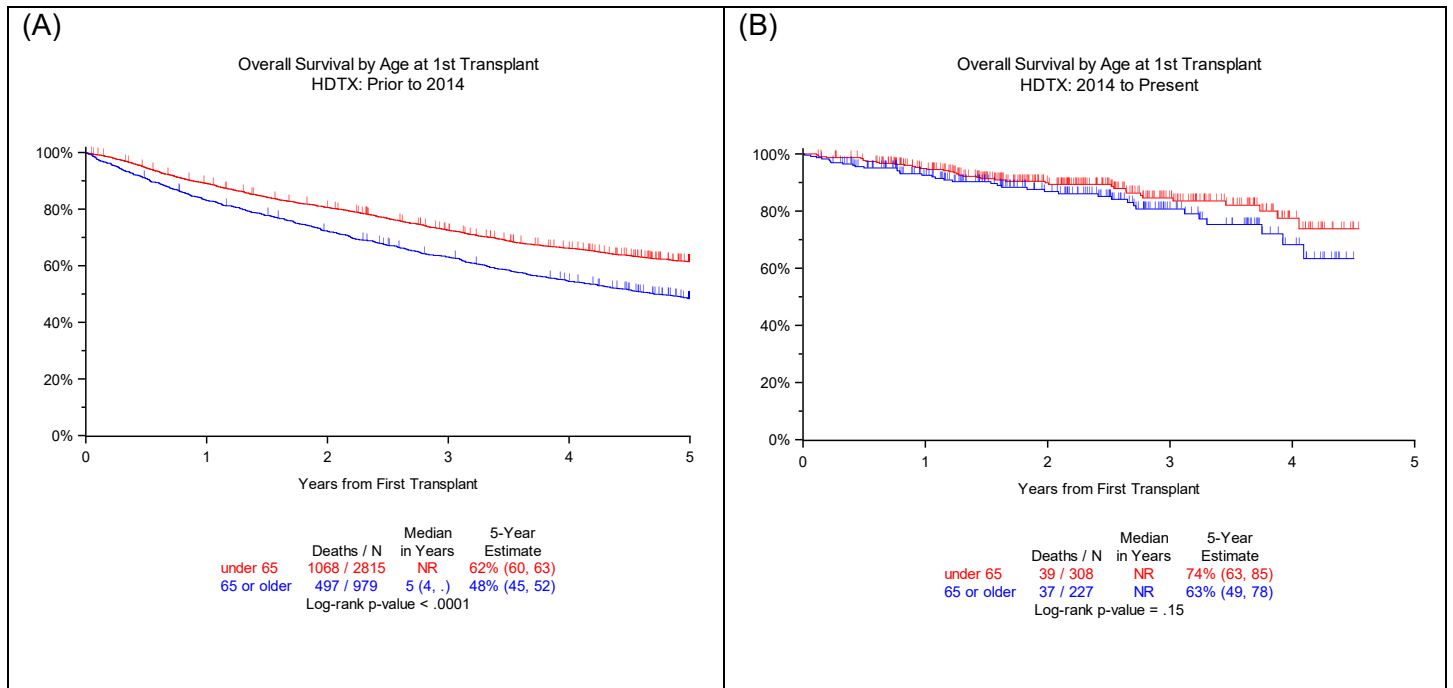

(A) OS Kaplan-Meier Restricted to Patients with 1st ASCT Prior to 2014. (B) OS Kaplan-Meier Restricted to Patients with 1st ASCT in 2014 or Later.

### Supplemental Figure 3. Kaplan-Meier Curves for Single vs Tandem Transplant.

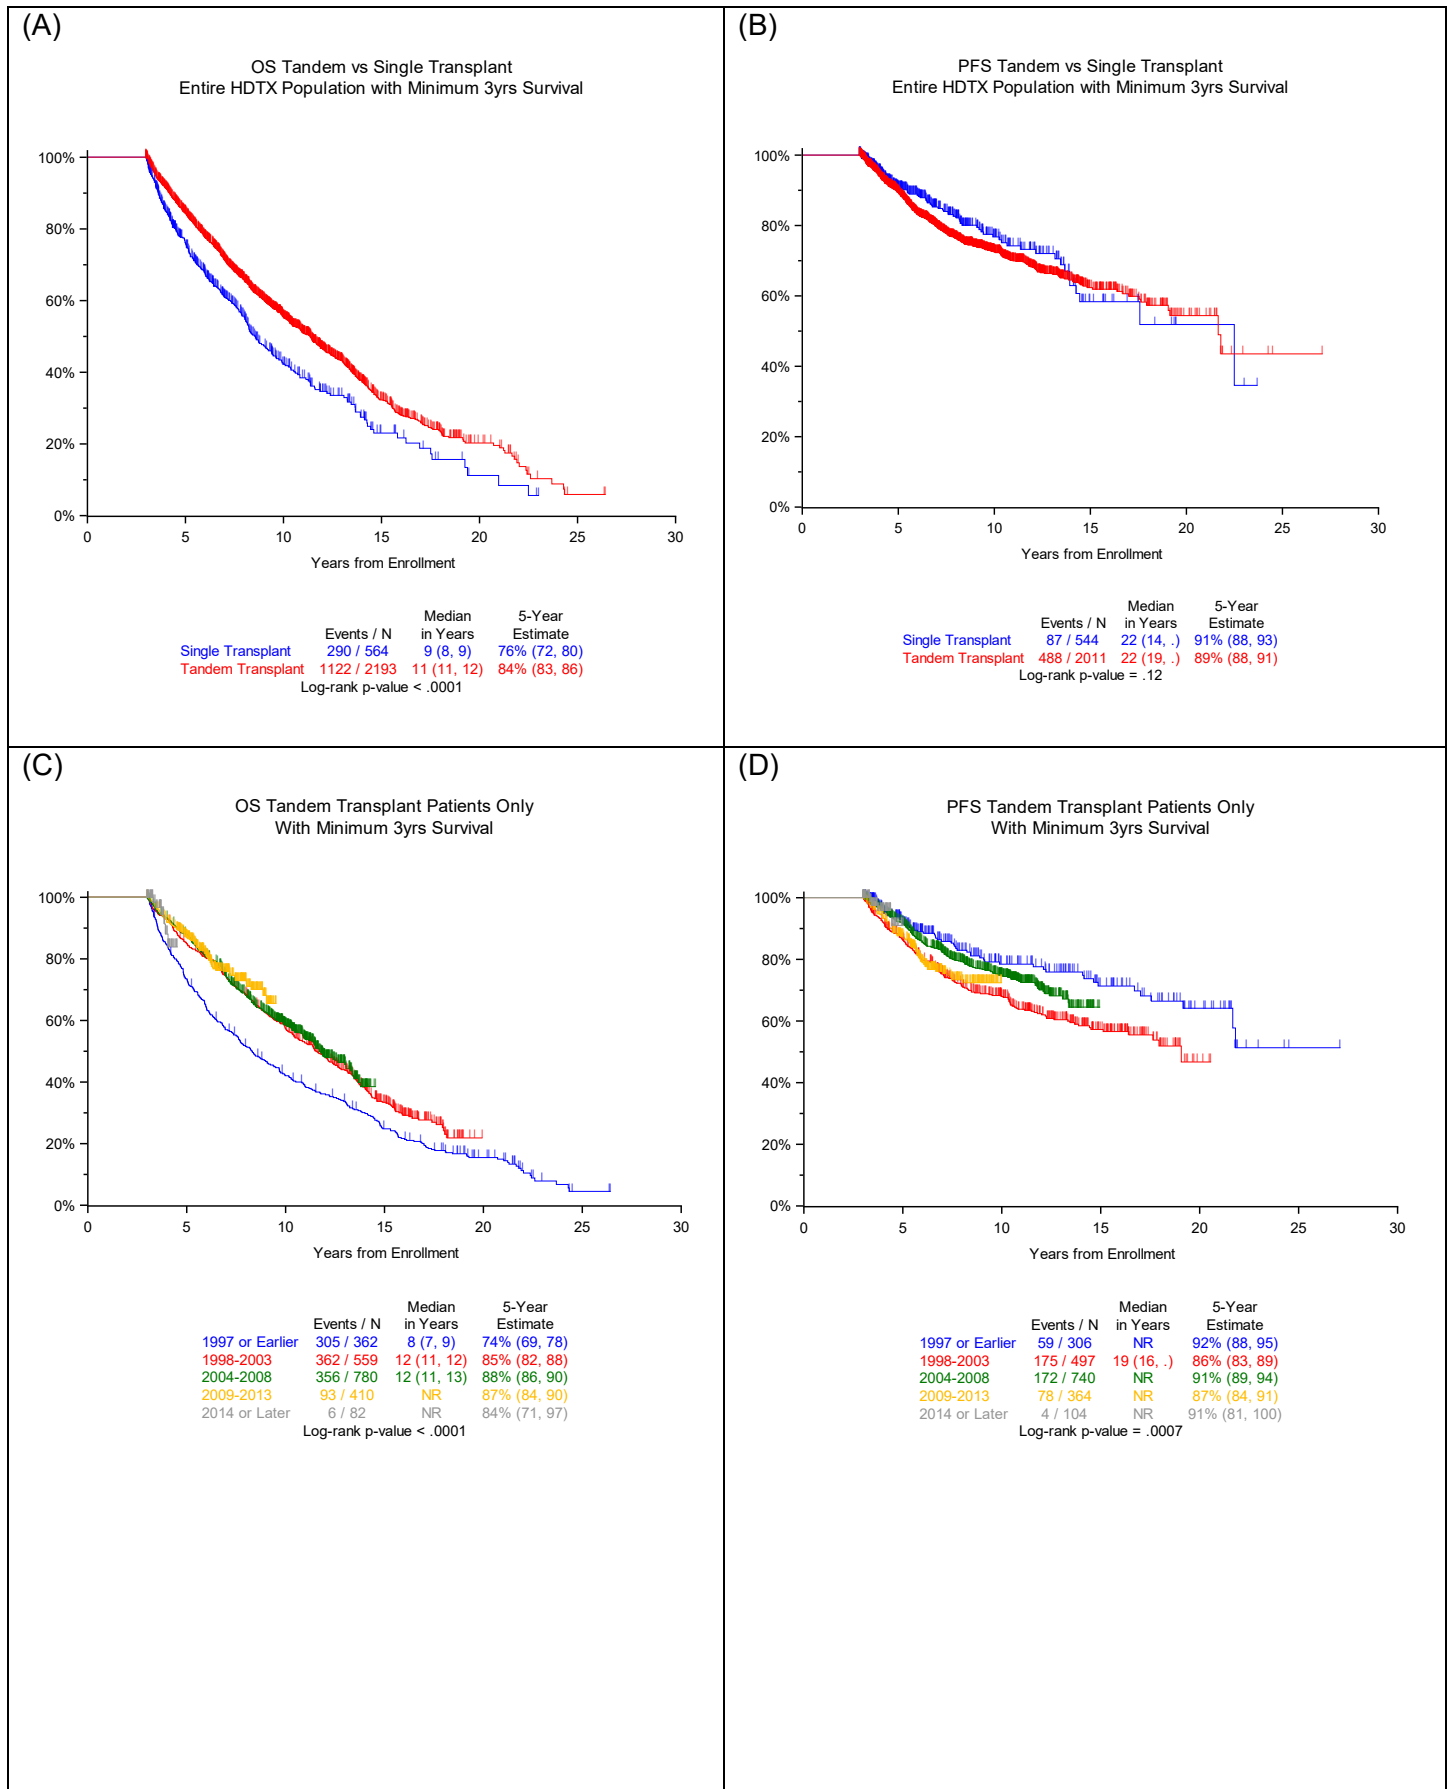

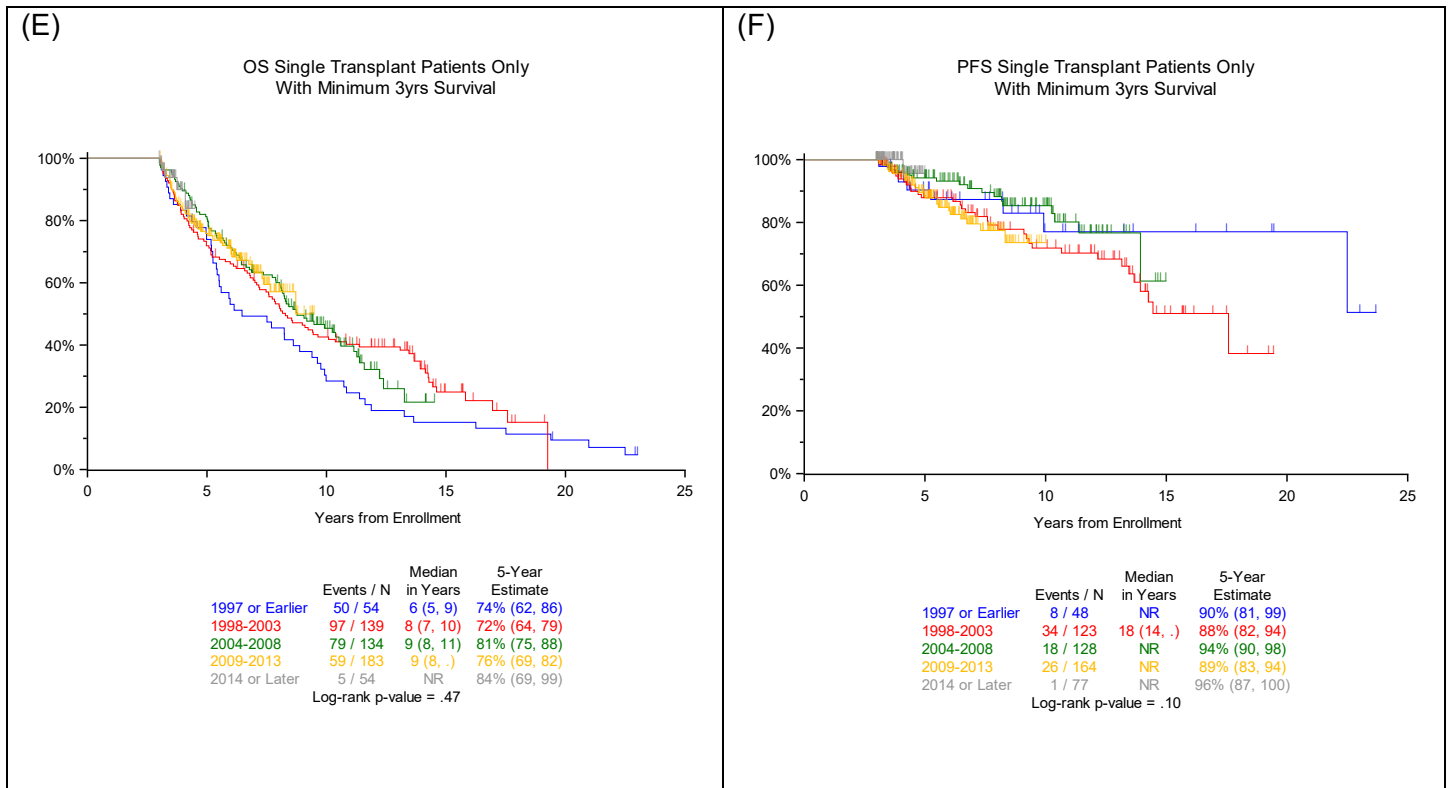

(A) OS Kaplan-Meier with 3-year landmark comparing single vs tandem transplant patients. (B) PFS Kaplan-Meier with 3-year landmark comparing single vs tandem transplant patients only. (C) OS Kaplan-Meier with 3-year landmark restricted to tandem transplant patients only. (D) PFS Kaplan-Meier with 3-year landmark restricted to tandem transplant patients only. (E) OS Kaplan-Meier with 3-year landmark restricted to single transplant patients only. (F) PFS Kaplan-Meier with 3-year landmark restricted to single transplant patients only.

### Supplemental Figure 4. Kaplan-Meier Curves for Single vs Tandem Transplant

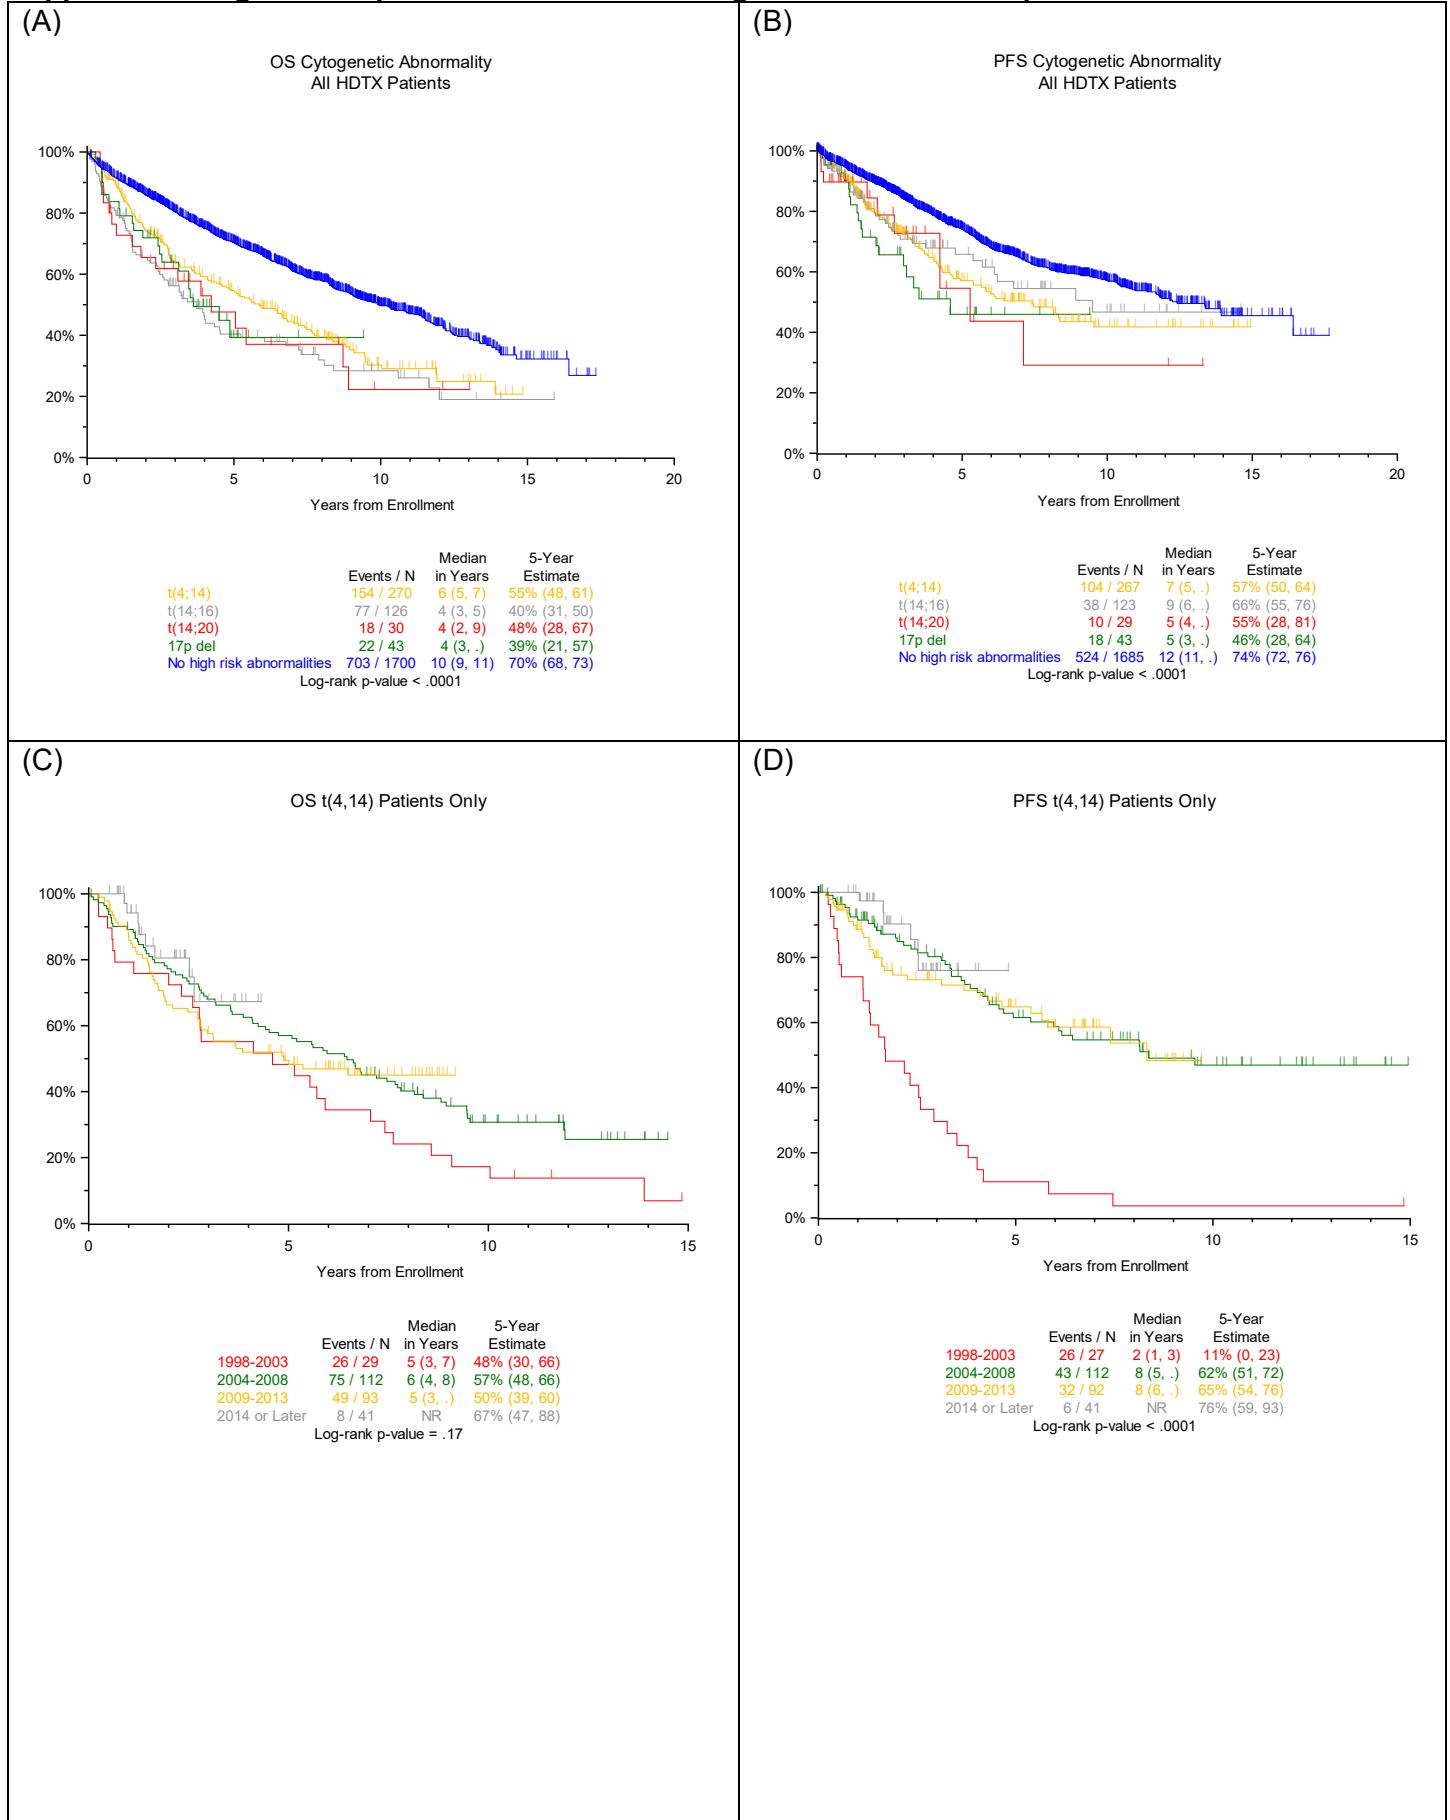

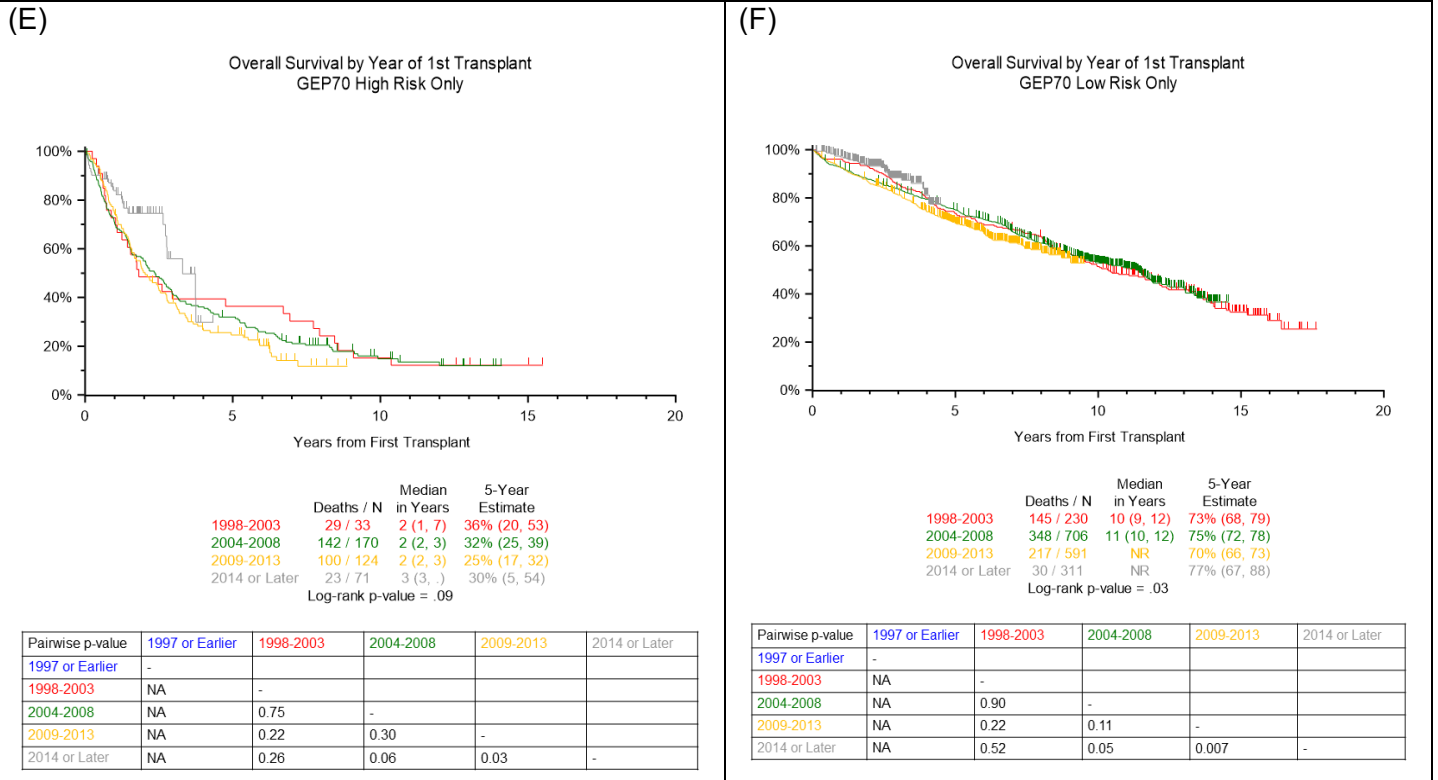

(A) OS Kaplan-Meier comparing cytogenetic abnormalities. (B) PFS Kaplan-Meier comparing cytogenetic abnormalities. (C) OS Kaplan-Meier among t(4;14) patients only. (D) PFS Kaplan-Meier among t(4;14) patients only. (E) OS Kaplan-Meier Restricted to GEP70 High Risk Only. (F) OS Kaplan-Meier Restricted to GEP70 Low Risk Only.

**Supplemental Figure 5A. Cox Proportional Hazard Model in Restricted to Patients Less than 65 Years Old**

**Cox Model - Less Than 65 Years Old (n=3271)**

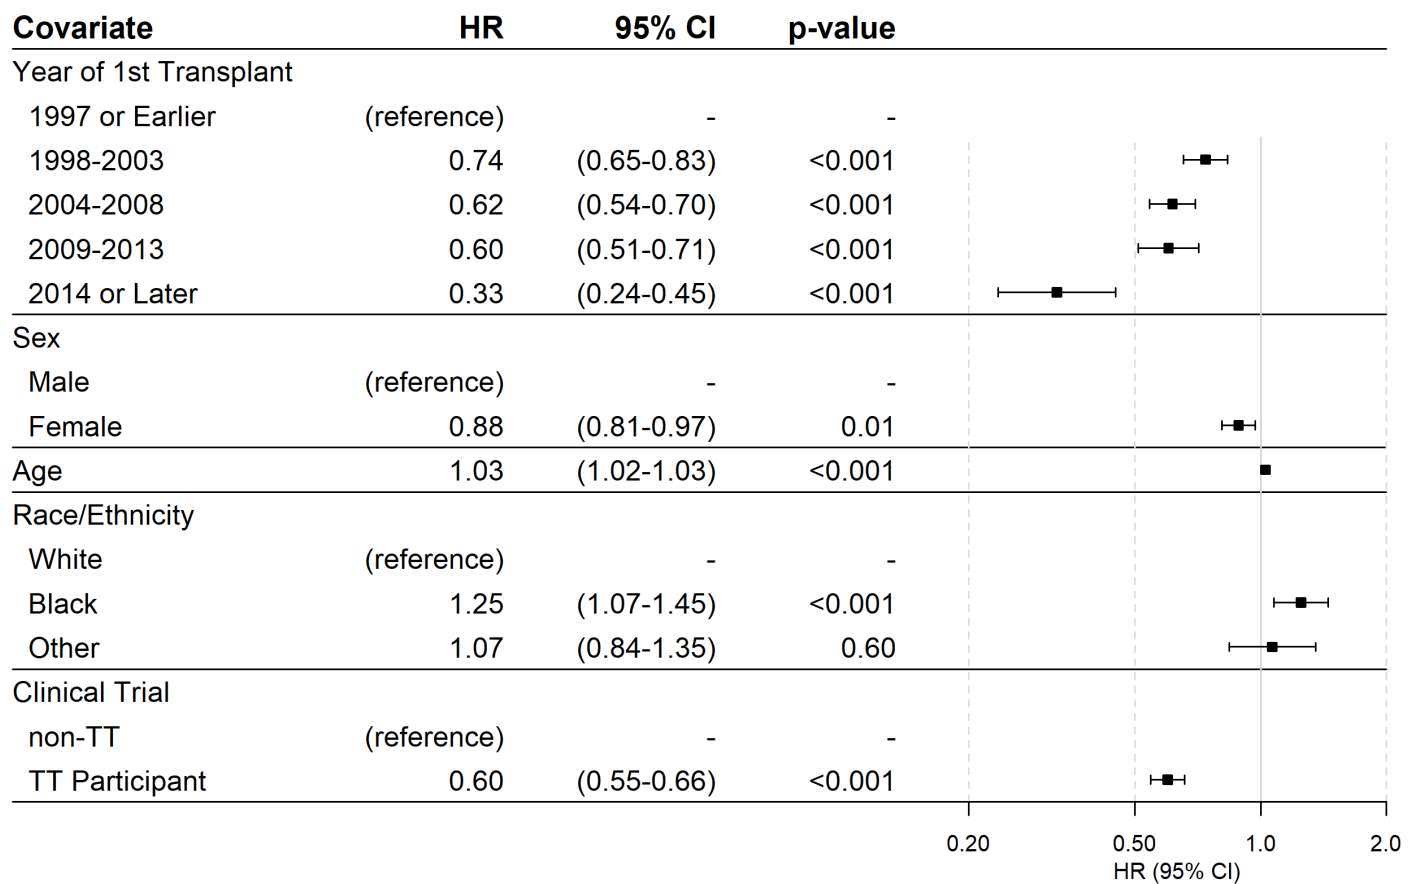

HR=Hazard Ratio, CI=Confidence Interval, TT=Total Therapy Trial

**Supplemental Figure 5B. Cox Proportional Hazard Model in Restricted to Patients Less 65 or Older**

**Cox Model - 65 or Older (n=1058)**

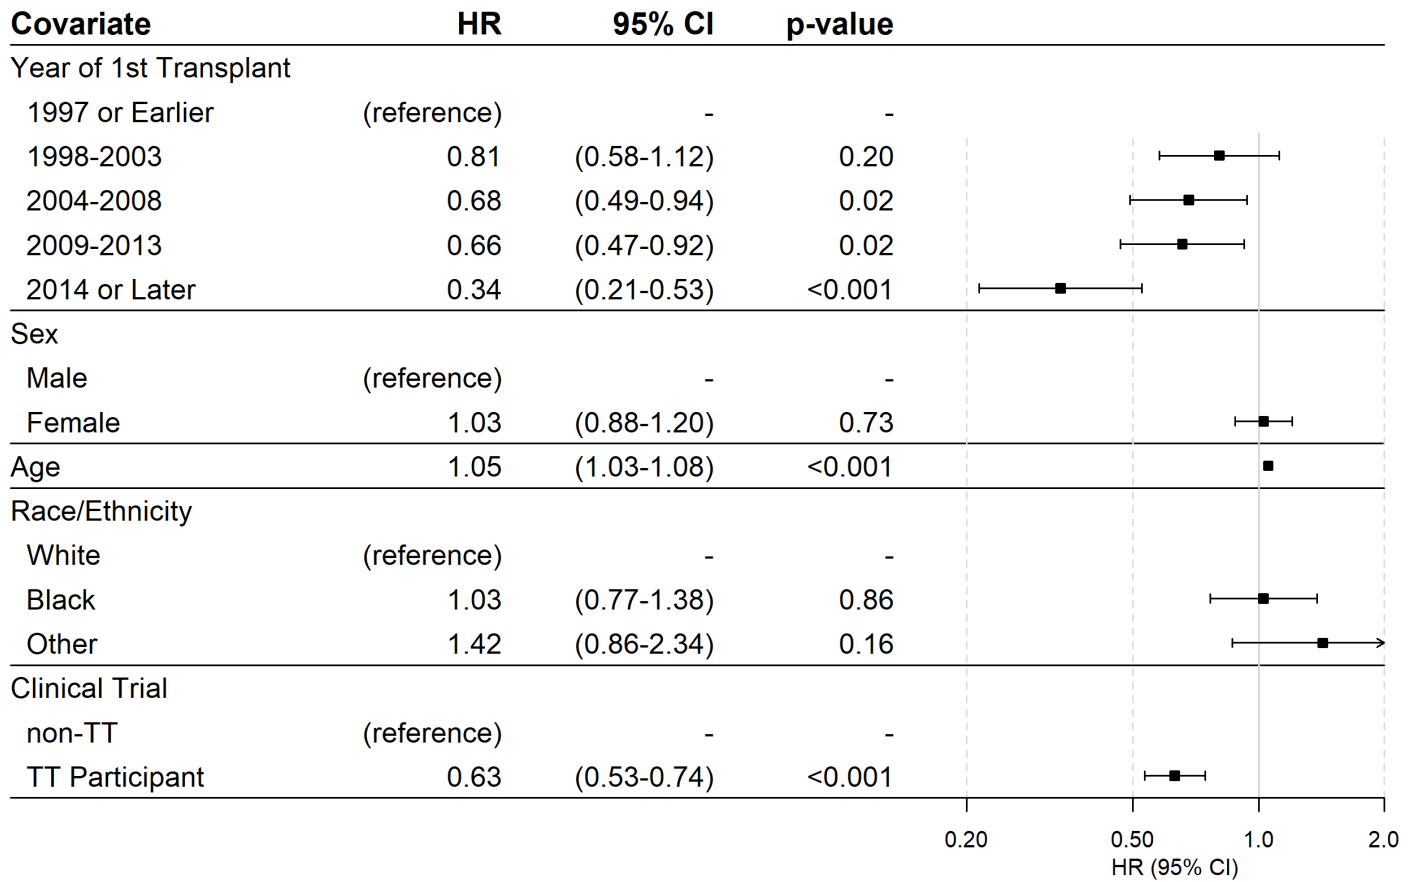

HR=Hazard Ratio, CI=Confidence Interval, TT=Total Therapy Trial



**Supplemental Figure 5C. Cox Proportional Hazard Model in Restricted to GEP70 High Risk Patients**

**Cox Model - GEP70 High Only (n=398)**

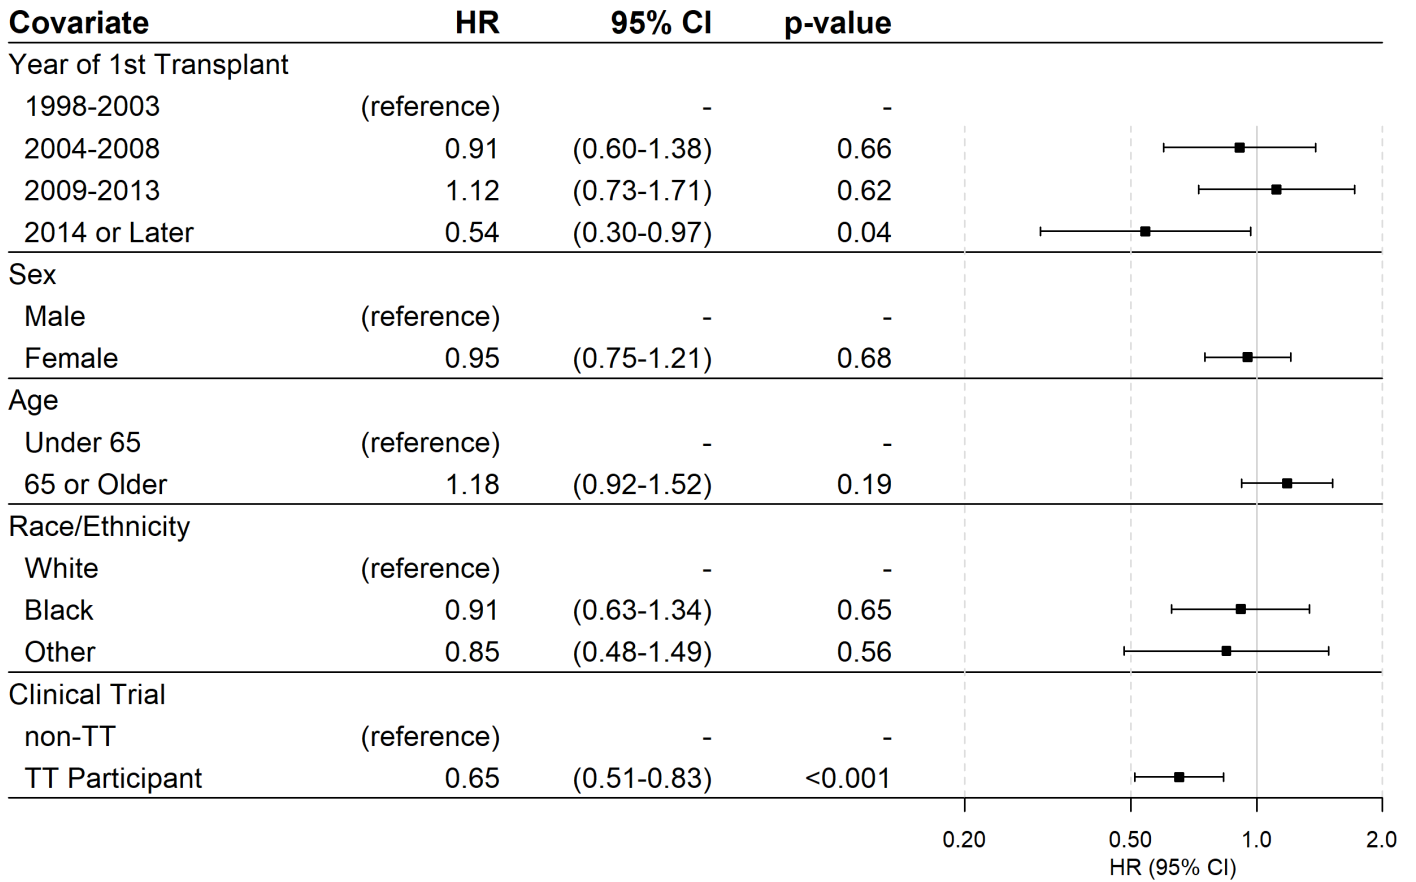

HR=Hazard Ratio, CI=Confidence Interval, TT=Total Therapy Trial

**Supplemental Figure 5D. Cox Proportional Hazard Model in Restricted to GEP70 Low Risk Patients**

**Cox Model - GEP70 Low Only (n=1838)**

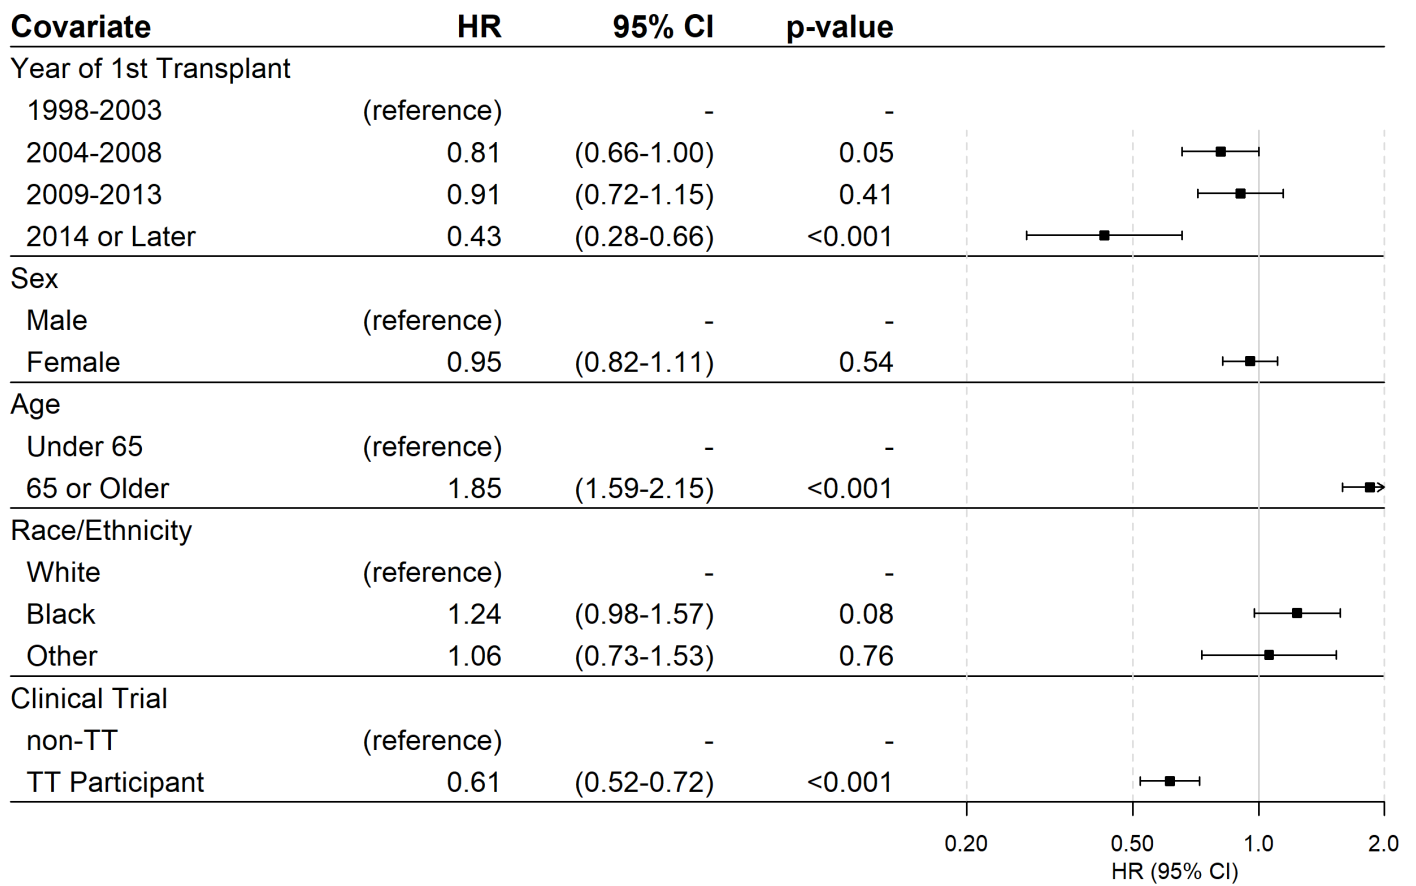

HR=Hazard Ratio, CI=Confidence Interval, TT=Total Therapy Trial

## Supplemental Figure 6. Cumulative Relative Survival

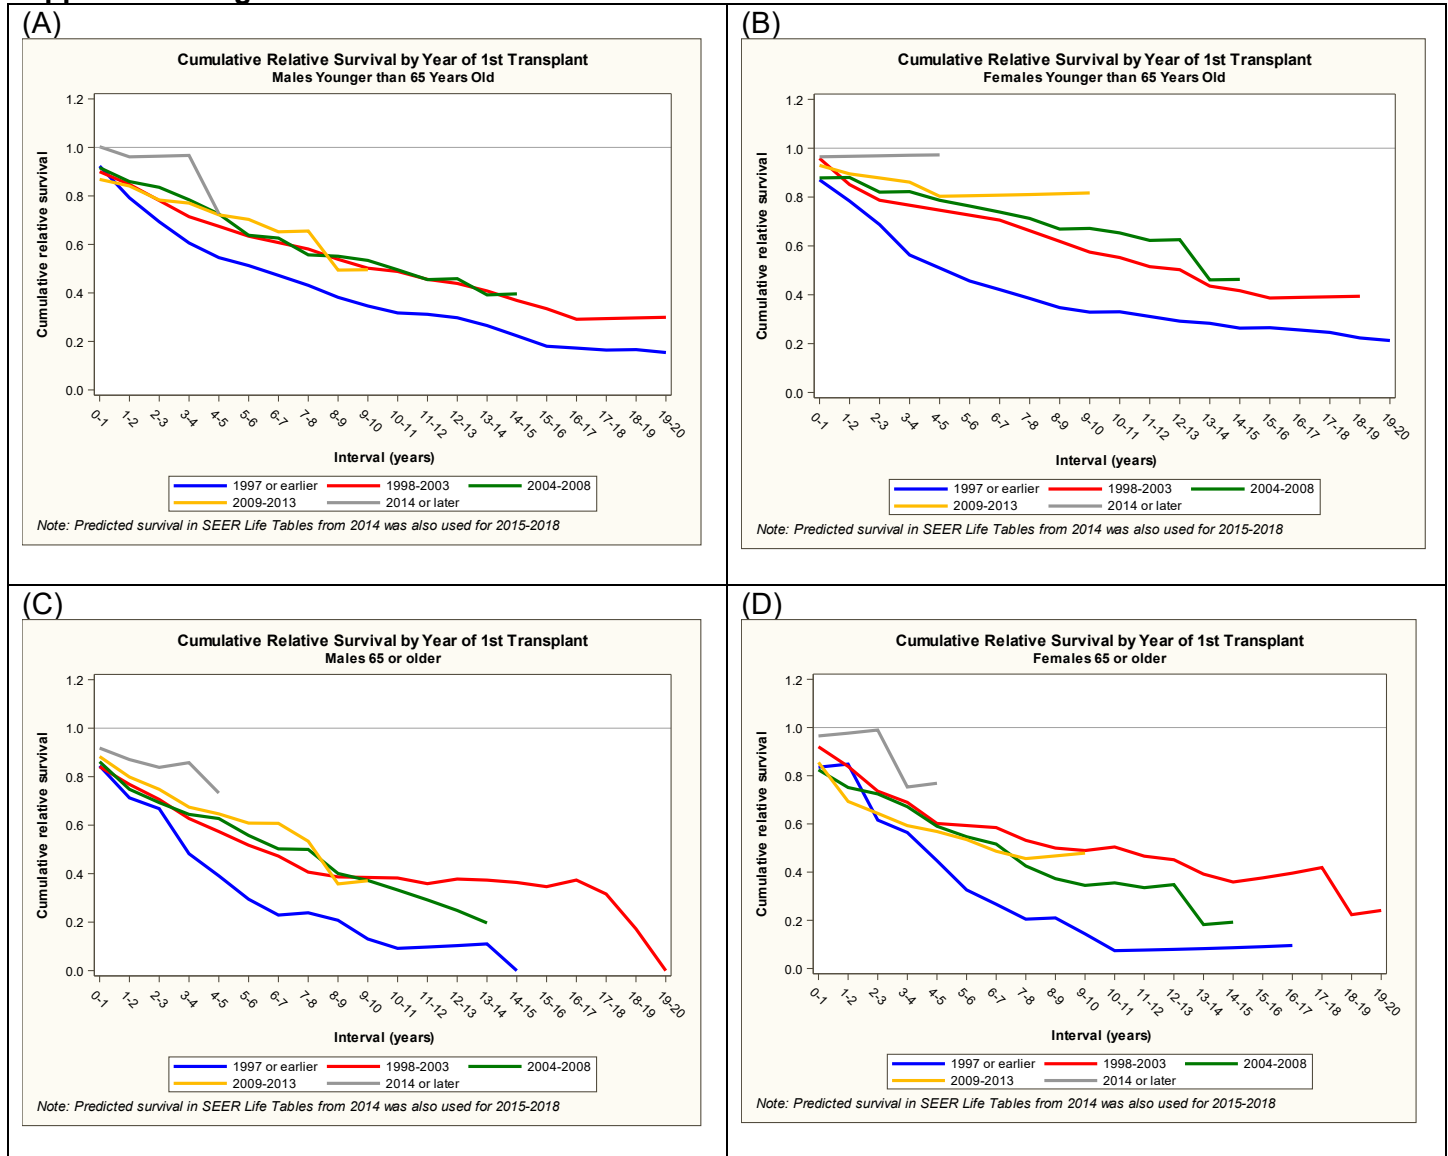

(A) Cumulative relative survival restricted to males younger than 65 years old (n=1889). (B) Cumulative relative survival restricted to females younger than 65 years old (n=1234). (C) Cumulative relative survival restricted to males 65 or older (n=757). (D) Cumulative relative survival restricted to females 65 or older (n=449). Cumulative relative survival shows the ratio of the observed survival in the UAMS cohort, relative to the normal expected survival in the SEER Life Tables, matched on age, sex, year, and race/ethnicity. Lines that near 1.0 would indicate that UAMS survival is approaching the rates of SEER survival, where the excess mortality due to MM for a given year interval is approaching 0. Downward sloping lines indicate consecutive years of follow-up where UAMS survival was worse compared to SEER survival, while lines that plateau would indicate years when the UAMS survival was similar to SEER survival.

## Supplemental Figure 7. Complete Response (CR) or Better Among TT Patients

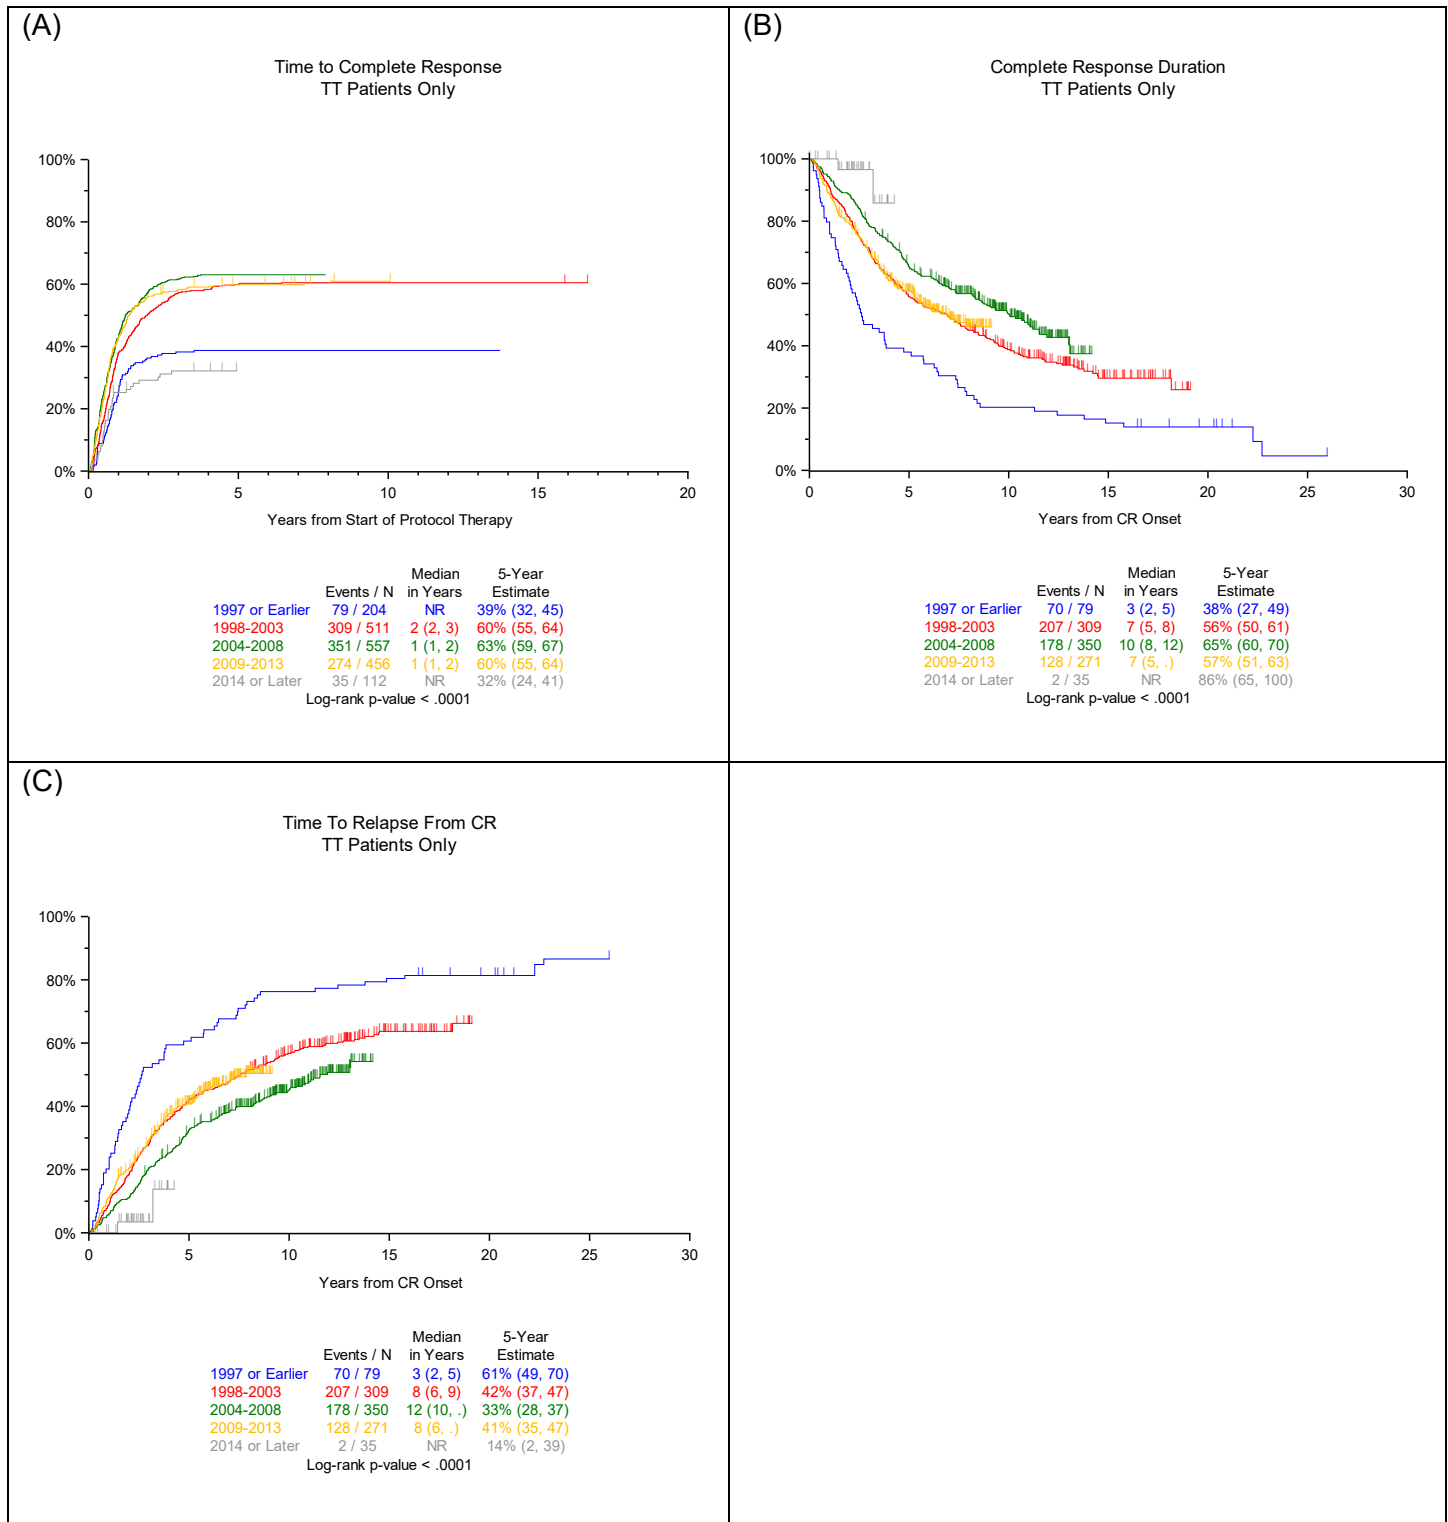

(A) Time to achieve Complete Response (CR) or better among TT patients. (B) Duration of CR among TT patients. (C) Time to relapse or death among patients who achieved CR or better.
